# Supplementary material for: Novel Node Centrality-Based Efficient Empirical Robustness Assessment for Directed Network
Source: Hindawi journal article supplement (doi:10.1155/2020/8715619), 2020-11-20
Supplement: f1 [file 8715619.f1.pdf]

Dear Editors:

1 ) These data used to support the findings of this study are included within the supplementary information file(s) :

- Dataset BACSF(a) is openly available in paper "Réka Albert, Hawoong Jeong & Albert-László Barabási .Error and attack tolerance of complex networks [J]. Nature 2000; 406, 378-382." The generating code by Professor Wu Ye with the URL: [http://www.sciencenet.cn/m/user\\_content.aspx?id=256965](http://www.sciencenet.cn/m/user_content.aspx?id=256965).
- Dataset Call Community (b) is openly available on URL: [https://www.researchgate.net/profile/Xiaolong\\_Deng3/publication/339363410\\_Call\\_Community\\_b/data/5e4d56d892851c7f7f45cf81/Call-Community-b.txt](https://www.researchgate.net/profile/Xiaolong_Deng3/publication/339363410_Call_Community_b/data/5e4d56d892851c7f7f45cf81/Call-Community-b.txt)
- Dataset LFR (c) is openly available on URL: [https://www.researchgate.net/profile/Xiaolong\\_Deng3/publication/339363469\\_LFR\\_c/data/5e4d560fa6fdccd965b11b59/LFR-c.dat](https://www.researchgate.net/profile/Xiaolong_Deng3/publication/339363469_LFR_c/data/5e4d560fa6fdccd965b11b59/LFR-c.dat). Its Generating code URL can be found in "benchmark.rar" which can be found in Article: A. Lancichinetti, S. Fortunato, Community detection algorithms: A comparative analysis [J]. Phys. Rev. E Stat. Nonlinear Soft Matter Phys. 80(5) 650 (2009) 056117. doi:10.1103/PhysRevE.80.056117.
- Dataset OSLOM(a) is openly available on URL: [https://www.researchgate.net/profile/Xiaolong\\_Deng3/publication/339363463\\_OSLOM\\_directed\\_network/data/5e4d555392851c7f7f45cf27/OSLOM.txt](https://www.researchgate.net/profile/Xiaolong_Deng3/publication/339363463_OSLOM_directed_network/data/5e4d555392851c7f7f45cf27/OSLOM.txt)
- Dataset Subject Reference (b) dataset was provided by the INFOMAP algorithm which was a subject reference network from the research of Physics, Chemistry,

Biology, and Ecology in 6,128 journals connected by 6,434,916 citations from paper “M. Rosvall and C. T. Bergstrom, Maps of random walks on complex networks reveal community structure [J]. Proceedings of the National Academy of Sciences, 2008.vol. 105, no. 4, pp: 1118–1123, 2008.”

- Dataset DBLP(a ) dataset is a famous directed heterogeneous information network that contains a data set of author-centric English literature in the field of computer science with 14736 papers and 14475 authors from paper “Ming Ji, Yizhou Sun, Marina Danilevsky. Graph Regularized Transductive Classification on Heterogeneous Information Networks[C]// Machine Learning and Knowledge Discovery in Databases, European Conference, ECML PKDD 2010, Barcelona, Spain, September 20-24, 2010, Proceedings, Part I. Springer-Verlag and it can be accessed from <http://snap.stanford.edu/data/>
- Dataset ENRON(b) is openly available on URL: [https://www.researchgate.net/publication/339363205\\_enron\\_email\\_dataset\\_from\\_httpsnapstanfordedudataemail-Enronhtml](https://www.researchgate.net/publication/339363205_enron_email_dataset_from_httpsnapstanfordedudataemail-Enronhtml)
- Dataset Facebook(c) is openly available on URL: [https://www.researchgate.net/profile/Xiaolong\\_Deng3/publication/339363520\\_facebook\\_combined/data/5e4d546c92851c7f7f45cf09/facebook-combined.txt](https://www.researchgate.net/profile/Xiaolong_Deng3/publication/339363520_facebook_combined/data/5e4d546c92851c7f7f45cf09/facebook-combined.txt)
